# Supplementary material for: A Continuous Statistical Phasing Framework for the Analysis of Forensic Mitochondrial DNA Mixtures
Source: PubMed Central journal article supplement (PMC7909279; doi:10.3390/genes12020128), 2021-01-20
Supplement: genes-12-00128-s001.pdf [file genes-12-00128-s001.pdf]

Table S1. Information on population, sample name and haplogroup for the individuals used to generate the mixtures in this study (from Strobl et. al.2019).

| Population                | Sample Name | Haplogroup    |
|---------------------------|-------------|---------------|
| Brazilian Native American | NaBr02      | B2e           |
| Brazilian Native American | NaBr04      | A2+(64)       |
| Brazilian Native American | NaBr05      | B2e           |
| Brazilian Native American | NaBr06      | D1            |
| Brazilian Native American | NaBr07      | B2e           |
| Brazilian Native American | NaBr08      | B+C17:C572    |
| Brazilian Native American | NaBr09      | A2ac          |
| Brazilian Native American | NaBr10      | K1a4a1        |
| Brazilian Native American | NaBr11      | C1b           |
| Brazilian Native American | NaBr12      | A2+(64)+16129 |

Table S2. Hamming distances within and between haplotypes used in this study.

---

|                                          |      |
|------------------------------------------|------|
| Minimum pairwise distance                | 1.0  |
| Maximum pairwise distance                | 56.0 |
| Average pairwise distance                | 38.6 |
| Smallest minimum distance from the panel | 1.0  |
| Largest minimum distance from the panel  | 39.0 |
| Average minimum distance from the panel  | 9.7  |

---

Table S3. List of assumptions involved in the deconvolution of mtDNA mixtures using the proposed method and ramifications when these assumptions are violated. He = one copy of the alternative (i.e. non reference) allele and one of the reference; HoR = two copies of the reference nucleotide

---

| Assumption                                                                                 | Result of violation                                                                                  |
|--------------------------------------------------------------------------------------------|------------------------------------------------------------------------------------------------------|
| No allelic drop-outs                                                                       | The algorithm lacks information to assign dropped sites to phased haplotypes                         |
| No point heteroplasmies                                                                    | The algorithm duplicates the heteroplasmic position in the phased haplotype                          |
| All He sites called                                                                        | The algorithm falsely calls the position a HoR site                                                  |
| Relative proportions of allele approximately constant across all sites (i.e. low variance) | The algorithm lacks information to assign sites that deviate from other sites in relative proportion |

---
